# Supplementary material for: Purification of As(iii) through oxidation of siderite and As(iii) by dissolved oxygen: behavior and mechanism
Source: Royal Society of Chemistry journal article supplement (doi:10.1039/d3en00974b), 2024-01-01
Supplement: d3en00974b1.pdf [file d3en00974b1.pdf]

## Supplementary Information

### **Purification As(III) through oxidation of siderite and As(III) by dissolved oxygen: Behavior and Mechanism**

Wenting Yu <sup>a,b</sup>, Zhipeng Gao <sup>a,b</sup>, Huaming Guo <sup>a,b\*</sup>

<sup>a</sup> State Key Laboratory of Biogeology and Environmental Geology, China University of Geosciences (Beijing), Beijing 100083, P.R. China.

<sup>b</sup> Key Laboratory of Groundwater Conservation of MWR & School of Water Resources and Environment, China University of Geosciences (Beijing), Beijing 100083, P.R. China

\* Corresponding Author: Huaming Guo,

Email: [hmguo@cugb.edu.cn](mailto:hmguo@cugb.edu.cn);

Phone: +86-10-8232-1366;

Fax: +86-10-8232-1081

## Text S1 Chemicals

Chemicals used in all experiments included sodium bicarbonate ( $\text{NaHCO}_3$ ), ferrous sulfate heptahydrate ( $\text{FeSO}_4 \cdot 7\text{H}_2\text{O}$ ), sodium hydroxide ( $\text{NaOH}$ ), nitric acid ( $\text{HNO}_3$ ), sulfuric acid ( $\text{H}_2\text{SO}_4$ ), hydrochloric acid ( $\text{HCl}$ ), hydrofluoric acid ( $\text{HF}$ ), boric acid ( $\text{H}_3\text{BO}_3$ ), sodium citrate, N-hydroxyethylpiperazine-1-ethanesulfonic acid, hydroxyl ammonium chloride, phenanthroline, 1,10-phenanthroline, ethanol, potassium iodine ( $\text{KI}$ ), sodium benzoate ( $\text{BA}$ ), *p*-hydroxybenzoic acid (*p*-HBA), acetonitrile, trifluoroacetic acid (TFA) and potassium bromide ( $\text{KBr}$ ). All were purchased from Sinopharm Co., Ltd. Ultrapure water was used in the experiments.

## Text S2 Siderite preparation

Siderite was synthesized following previous methods.<sup>1-3</sup> Briefly, 0.05 mol of ferrous sulfate heptahydrate ( $\text{FeSO}_4 \cdot 7\text{H}_2\text{O}$ ) and 0.1 mol sodium bicarbonate ( $\text{NaHCO}_3$ ) were mixed in 50 mL ultrapure water. After reaction for 24 h at 200 °C and 15 MPa, the produced precipitate was centrifuged at 6000 r/min for 10 min, filtered with 0.22  $\mu\text{m}$  filter membrane, and washed with deoxygenated water for several times. Subsequently, the synthesized siderite was dried in an anoxic glovebox (COY-7000220A, COY, USA) for about five days, which was grounded to powder of 200 mesh for subsequent As(III) removal experiment.

### Text S3 Total Fe and total Fe(II) measurement

Specifically, for total Fe(II) measurement, siderite suspensions (0.2 mL in volume) were sampled at selected time with a 1 mL syringe and injected into black centrifuge tubes. Hydrofluoric acid and sulfuric acid were added followed by boiling for 30 min to thoroughly dissolve siderite. 1,10-phenanthroline (10% in ethanol) was added as a color-developing agent. After color development, absorbance at 510 nm was recorded by a UV-vis spectrophotometer (UV-2550, SHIMADZU). For total Fe measurement, Fe(III) was pre-reduced into Fe(II) by 10% sodium citrate in the 1 N HCl solution, followed by the same measurement as Fe(II).<sup>4,5</sup>

### Text S4 Dissolved Fe and dissolved Fe(II) measurement

For dissolved Fe(II) measurement, the samples were acidified with 1 mol/L HCl. After addition of 1 mL of Ferrozine agent (1 g/L), the absorbance at 562 nm was recorded by a UV-vis spectrophotometer (UV-2550, SHIMADZU). For dissolved Fe measurement, Fe(III) was pre-reduced by hydroxyl ammonium chloride (m/v=10%) in 1 mol/L HCl into dissolved Fe(II), followed by the same measurement of dissolved Fe(II). Then, dissolved Fe(III) was obtained by subtracting dissolved Fe(II) from dissolved Fe.<sup>6</sup>

## References

- 1 B. Xing, M. Ouyang, N. Graham and W. Yu, Enhancement of phosphate adsorption during mineral transformation of natural siderite induced by humic acid: Mechanism and application, *Chem. Eng. J.*, 2020, **393**, 124730-124739. <https://doi.org/10.1016/j.cej.2020.124730>
- 2 Z. L. Yang, W Xiu, H. M. Guo and F. L. Li, Arsenate removal from aqueous solution by siderite synthesized under high temperature and high pressure, *Environ. Sci. Pollut. Res.*, 2017, **24**, 19402-19411. <https://doi.org/10.1007/s11356-017-9611-3>
- 3 S. Humel, B. Führer, M. Svetitsch, P. Mayer and A. P. Loibner, Targeting sorbed PAHs in historically contaminated soil - Can laccase mediator systems or Fenton' s reagent remove inaccessible PAHs? *J. Hazard. Mater.*, 2023, **443**, 130286-130293. <https://doi.org/10.1016/j.jhazmat.2022.130286>
- 4 M. Tokumura, R. Morito, R. Hatayama and Y. Kawase, Iron redox cycling in hydroxyl radical generation during the photo-Fenton oxidative degradation: Dynamic change of hydroxyl radical concentration, *Appl. Catal., B*, 2022, **106**, 565-576. <https://doi.org/10.1016/j.apcatb.2011.06.017>
- 5 N. Chen, M. Geng, D. Huang, M. Tan, Z. Li, G. Liu, C. Zhu, G. Fang and D. Zhou, Hydroxyl radical formation during oxygen-mediated oxidation of ferrous iron on mineral surface: Dependence on mineral identity, *J. Hazard. Mater.*, 2022, **434**, 128861-128870. <https://doi.org/10.1016/j.jhazmat.2022.128861>
- 6 Q. Zeng, X. Wang, X. L. Liu, L. Q. Huang, J. L. Hu, R. Chu, N. Tolic and H. L. Dong, Mutual interactions between reduced Fe-bearing clay minerals and humic acids under dark, oxygenated conditions: Hydroxyl radical generation and humic acid transformation, *Environ. Sci. Technol.*, 2020, **54**, 15013-15023. <https://doi.org/10.1021/acs.est.0c04463>

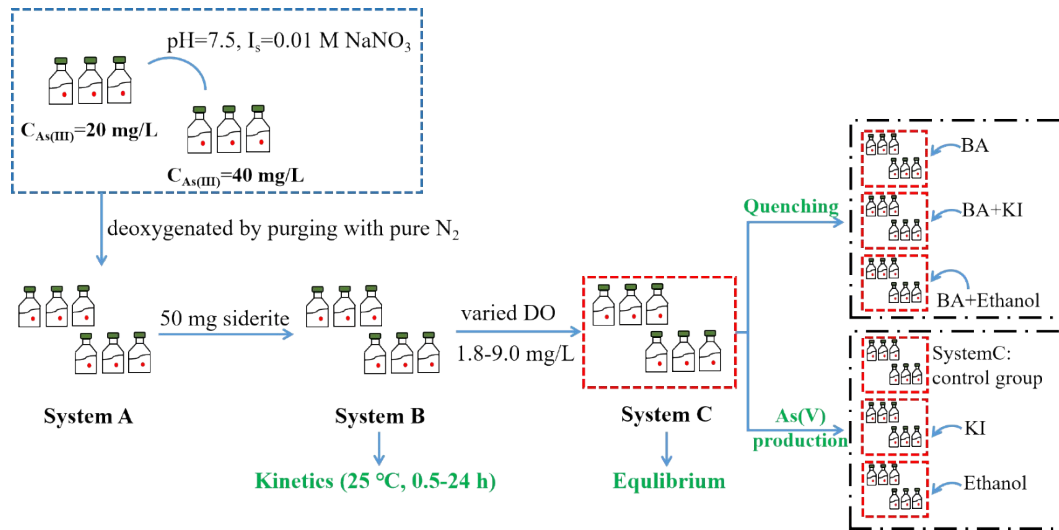

Fig. S1 Sketch of batch experiments of As(III) adsorption and oxidation on siderite

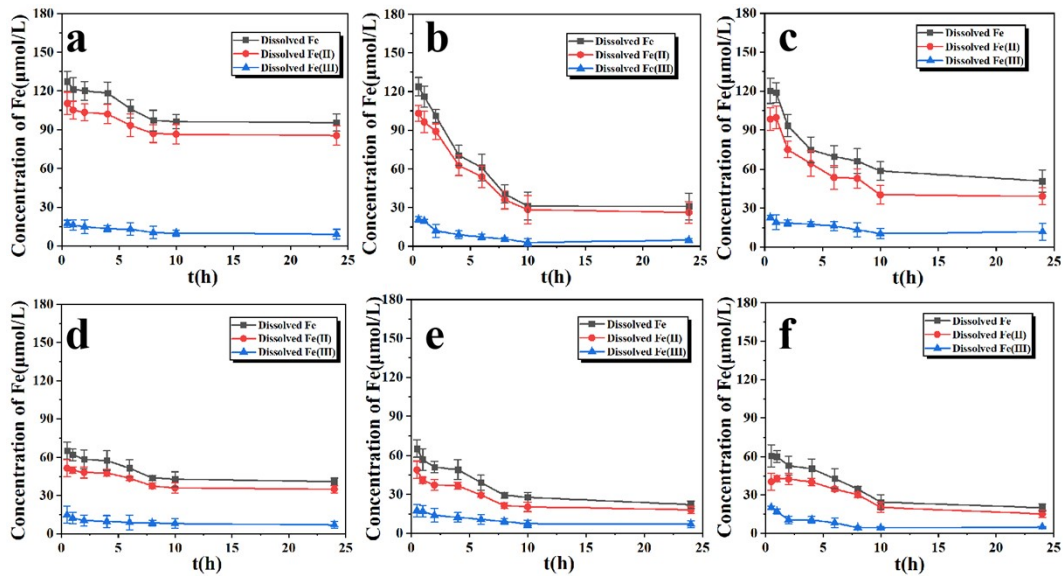

Fig. S2 Changes of dissolved Fe species in solutions with initial As(III) concentration of 20 mg/L (DO concentration of 1.8 mg/L (a), 4.6 mg/L (b), and 9.0 mg/L (c)) and 40 mg/L (DO concentration of 1.8 mg/L (d), 4.6 mg/L (e), and 9.0 mg/L (f))

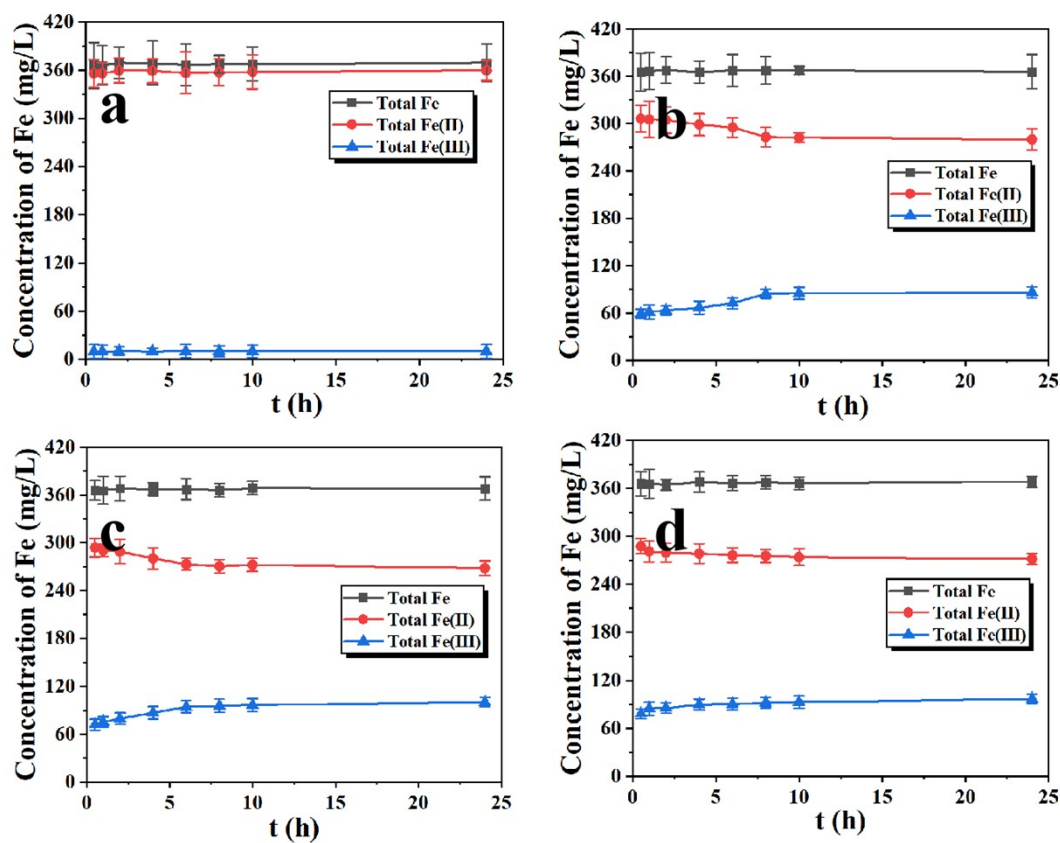

Fig. S3 Changes in concentrations of total Fe species in the ternary system with initial As(III) concentration of 20 mg/L (Solid/Liquid = 1 g/L, I = 0.05 M NaNO<sub>3</sub>, initial pH = 7.5, without DO (a), DO concentrations of 1.8 mg/L (b), 4.6 mg/L (c), and 9.0 mg/L (d))

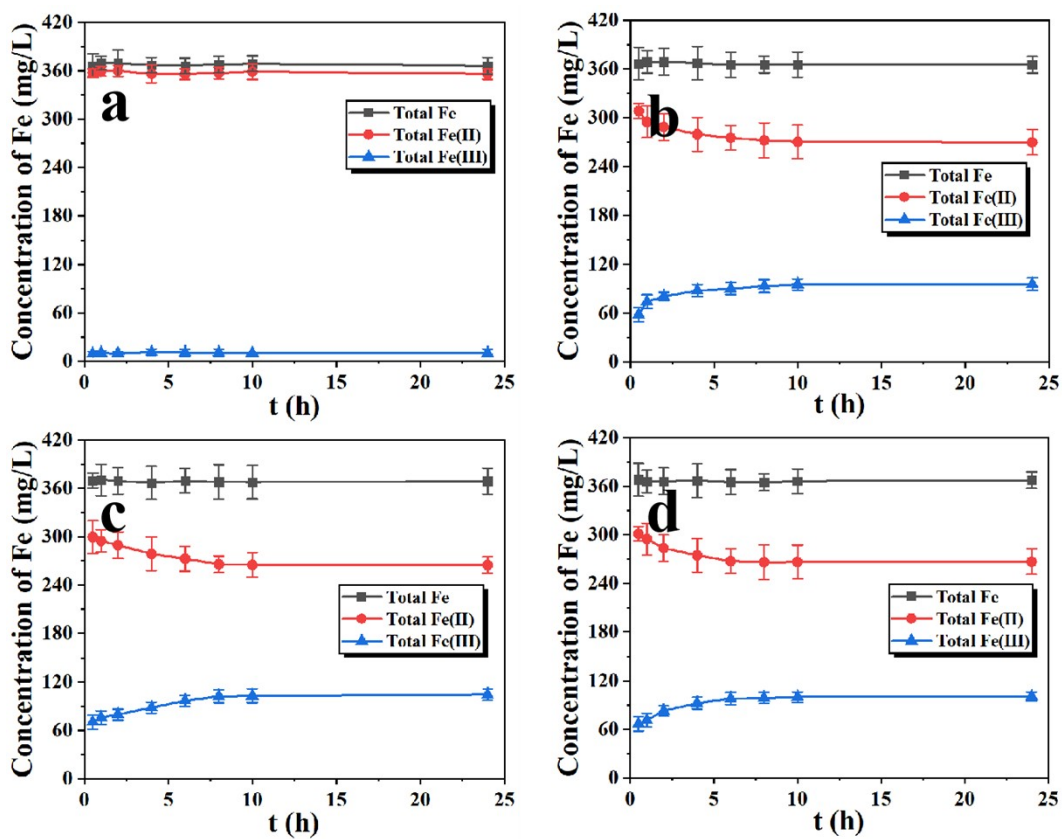

Fig. S4 Changes in concentrations of total Fe species in the ternary system with initial As(III) concentration of 40 mg/L (Solid/Liquid = 1 g/L, I = 0.05 M NaNO<sub>3</sub>, initial pH = 7.5, without DO (a), DO concentration of 1.8 mg/L (b), 4.6 mg/L (c), and 9.0 mg/L (d))

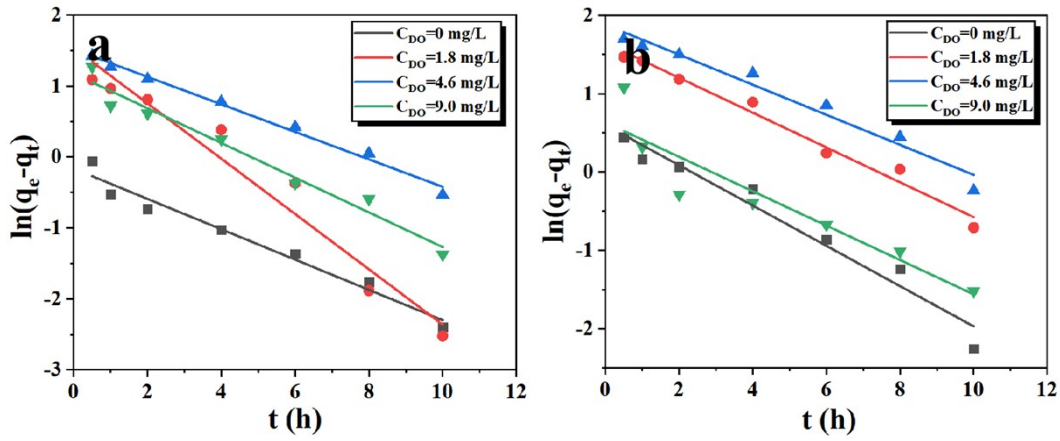

Fig. S5 The pseudo-first-order kinetic models of As(III) adsorption onto siderite (initial As(III) concentrations of 20 mg/L (a) and 40 mg/L (b))

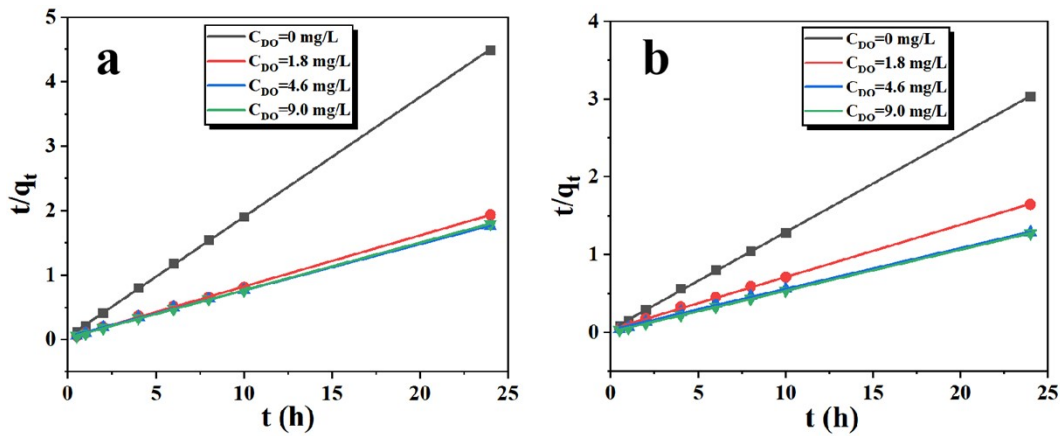

Fig. S6 The pseudo-second-order kinetic models of As(III) adsorption onto siderite (initial As(III) concentrations of 20 mg/L (a) and 40 mg/L (b))



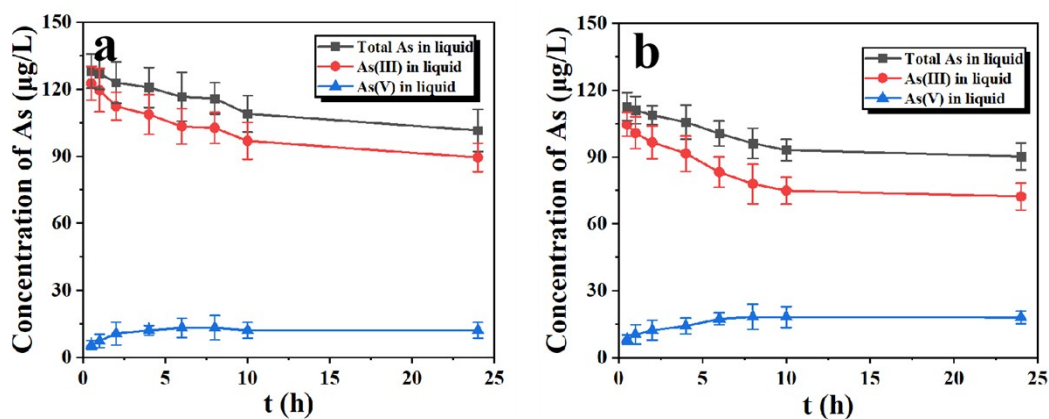

Fig. S7 Concentrations of dissolved As(III) and As(V) in the ternary system with DO concentration of 9.0 mg/L (Solid/Liquid = 1 g/L, I = 0.05 M NaNO<sub>3</sub>, initial pH = 7.5, initial As(III) concentrations of 20 mg/L (a) and 40 mg/L (b))

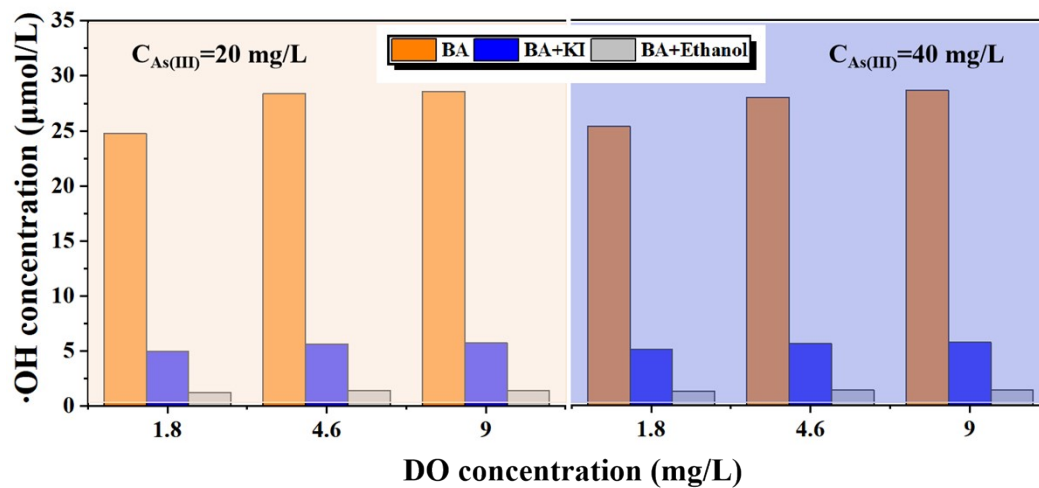

Fig. S8 Concentrations of •OH generated in the ternary systems with different DO concentrations (Solid/Liquid = 1 g/L, t = 24 h, I = 0.05 M NaNO<sub>3</sub>, initial pH = 7.5, BA is the scavenger of •OH, while KI and ethanol are quenchers of •OH)

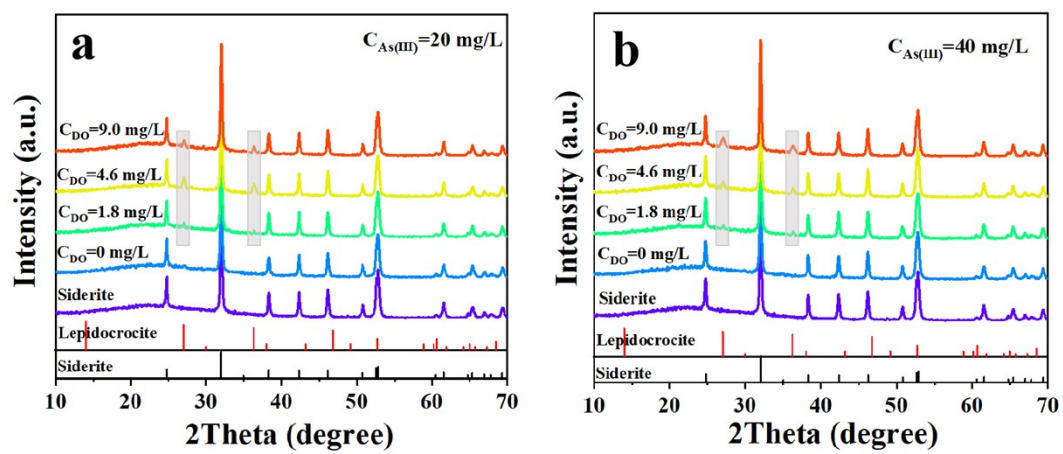

Fig. S9 The XRD of siderite and reacted siderite (initial As(III) concentrations of 20 mg/L (a) and 40 mg/L (b))

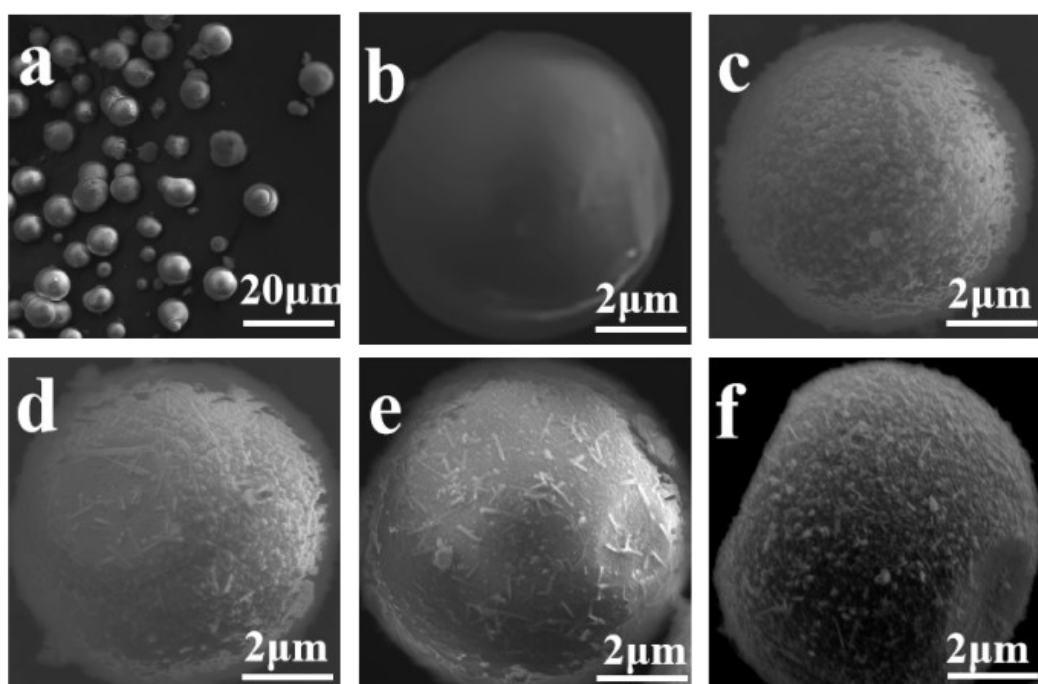

Fig. S10 SEM images of siderite (a, b) and reacted siderite with initial As(III) concentration of 20 mg/L (without DO (c), DO concentrations of 1.8 mg/L (d), 4.6 mg/L (e) and 9.0 mg/L (f))

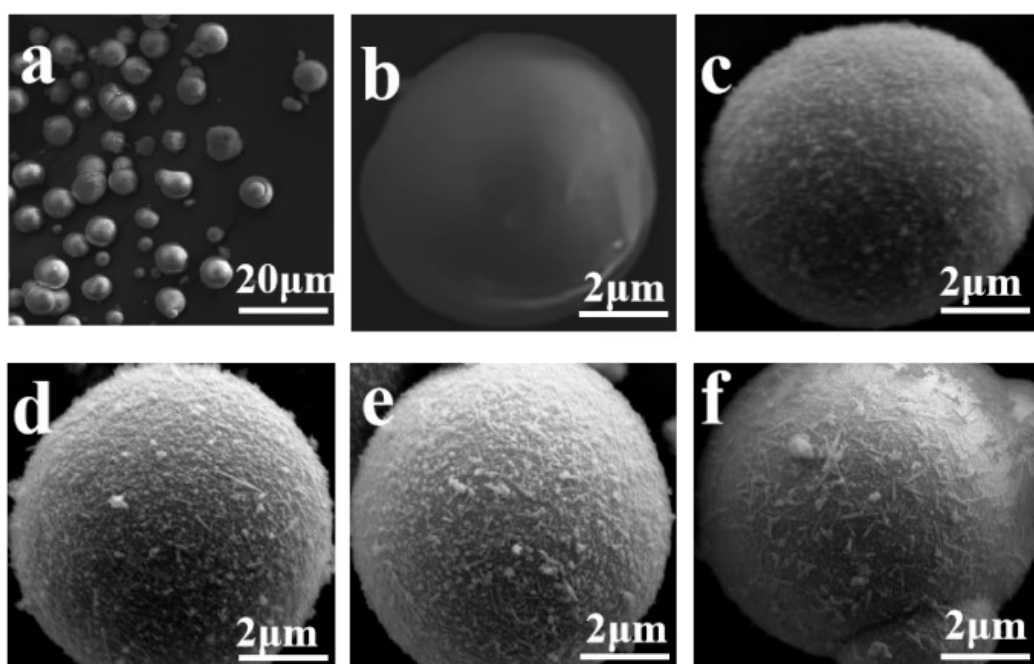

Fig. S11 SEM images of siderite (a, b) and reacted siderite with initial As(III) concentration of 40 mg/L (without DO (c), DO concentrations of 1.8 mg/L (d), 4.6 mg/L (e) and 9.0 mg/L (f))

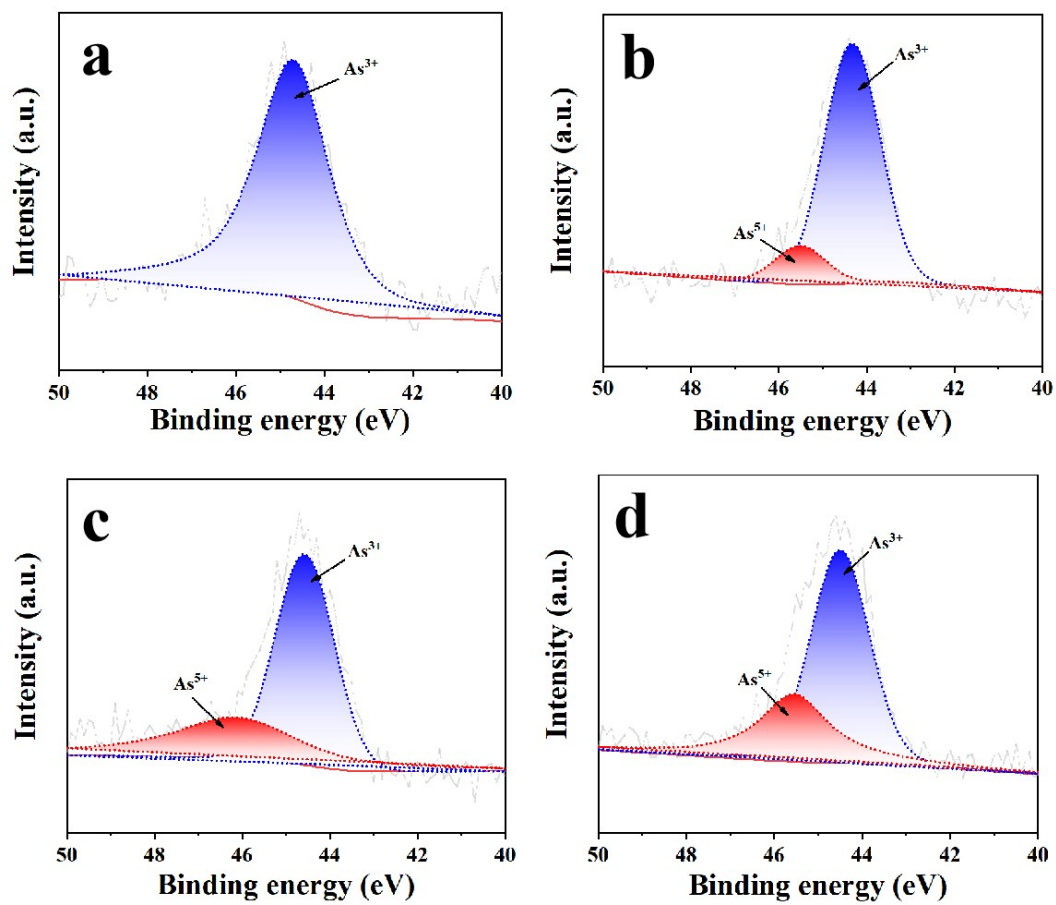

Fig. S12 The XPS of As 3d in reacted siderite from the ternary system with initial As(III) concentration of 20 mg/L (without DO (a), DO concentrations of 1.8 mg/L (b), 4.6 mg/L (c) and 9.0 mg/L (d))

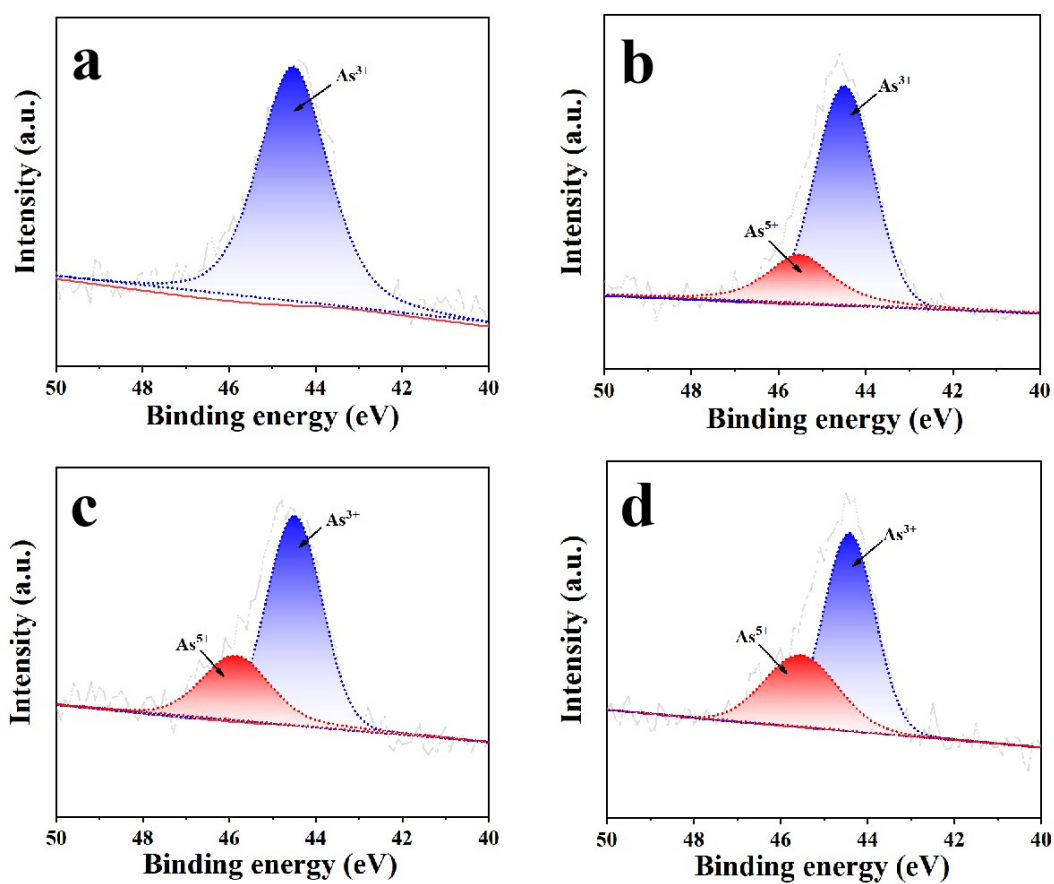

Fig. S13 The XPS of As 3d in reacted siderite in the ternary system with initial As(III) concentration of 40 mg/L (without DO (a), DO concentrations of 1.8 mg/L (b), 4.6 mg/L (c) and 9.0 mg/L (d))

Table S1 Kinetic parameters of As(III) adsorption on siderite with the absence and presence of DO

| As(III) (mg/L) | DO (mg/L) | Pseudo-first-order |                |                       | Pseudo-second-order |                       |                       |
|----------------|-----------|--------------------|----------------|-----------------------|---------------------|-----------------------|-----------------------|
|                |           | r                  | k <sub>1</sub> | q <sub>m</sub> (mg/g) | r                   | k <sub>2</sub>        | q <sub>m</sub> (mg/g) |
| 20             | 0         | 0.964              | 0.213          | 0.848                 | 0.999               | 0.0346                | 5.38                  |
|                | 1.8       | 0.946              | 0.389          | 4.63                  | 0.999               | 6.30×10 <sup>-3</sup> | 12.6                  |
|                | 4.6       | 0.988              | 0.194          | 4.55                  | 0.998               | 5.16×10 <sup>-3</sup> | 13.9                  |
|                | 9.0       | 0.962              | 0.244          | 3.24                  | 0.999               | 5.47×10 <sup>-3</sup> | 13.5                  |
| 40             | 0         | 0.953              | 0.257          | 1.83                  | 0.999               | 0.0156                | 7.80                  |
|                | 1.8       | 0.978              | 0.222          | 5.20                  | 0.999               | 4.52×10 <sup>-3</sup> | 14.9                  |
|                | 4.6       | 0.960              | 0.192          | 6.57                  | 0.998               | 2.75×10 <sup>-3</sup> | 19.1                  |
|                | 9.0       | 0.840              | 0.219          | 1.88                  | 0.999               | 2.79×10 <sup>-3</sup> | 18.9                  |

Table S2 Proportions of As(III) and As(V) in different depths of reacted siderite from the ternary system with DO concentration of 9.0 mg/L

| As(III) (mg/L) | Depth of siderite (nm) | As(III) proportions (%) | As(V) proportions (%) |
|----------------|------------------------|-------------------------|-----------------------|
| 20             | 0                      | 61.29                   | 38.71                 |
|                | 10                     | 64.89                   | 35.11                 |
|                | 20                     | 69.87                   | 30.13                 |
|                | 30                     | 74.98                   | 25.02                 |
|                | 40                     | 79.68                   | 20.32                 |
| 40             | 0                      | 65.43                   | 34.57                 |
|                | 10                     | 70.79                   | 29.21                 |
|                | 20                     | 77.76                   | 22.24                 |
|                | 30                     | 86.67                   | 13.33                 |
|                | 40                     | 91.98                   | 8.02                  |
